# Supplementary material for: A Gene Signature Predicting Natural Killer Cell Infiltration and Improved Survival in Melanoma Patients
Source: Oxford University Press journal article supplement (doi:10.1158/2326-6066.cir-18-0500), 2019-05-14
Supplement: 23266066cir180500-sup-205802_2_supp_5410854_prn3pl.xlsx [file 23266066cir180500-sup-205802_2_supp_5410854_prn3pl.xlsx]

## Sheet: NK_genes_curated
NK cell marker genes	Gene curation tests			Final list	Gene Provenance			Bulk RNA-seq tests		Tirosh et al (2016): B cells						Tirosh et al (2016): Cancer associated fibroblasts						Tirosh et al (2016): Endothelial cells						Tirosh et al (2016): Macrophages						Tirosh et al (2016): NK cells						Tirosh et al (2016): T cells						Tirosh et al (2016): Unresolved cells
HGNC Symbol	Pass bulk RNA-seq test	Pass single cell RNA-seq test	Pass CCLE abund tests	Cursons Guimaraes sigGene	LM22	LM7	Huntington	logFC	adj. p-value	Min.	1st quartile	Median	Mean	3rd quartile	Max.	Min.	1st quartile	Median	Mean	3rd quartile	Max.	Min.	1st quartile	Median	Mean	3rd quartile	Max.	Min.	1st quartile	Median	Mean	3rd quartile	Max.	Min.	1st quartile	Median	Mean	3rd quartile	Max.	Min.	1st quartile	Median	Mean	3rd quartile	Max.	Min.	1st quartile	Median	Mean
APOBEC3G	-	-	-	FALSE	TRUE	-	-	1.47497	0.980679	0	0	0	0.918337	0	7.0761	0	0	0	0.399231	0	5.5108	0	0	0	0.334303	0	4.9388	0	0	0	1.16366	2.64675	6.6017	0	0	5.6743	4.13089	6.7304	8.349	0	0	0	2.54165	5.71195	9.3485	0	0	0	1.46006
APOL6	-	-	-	FALSE	TRUE	-	-	1.56831	1	0	0.203195	0.48852	0.777312	0.91016	4.9718	0	0.121453	0.7083	1.18794	2.12462	4.5964	0	0.290643	0.616835	1.11591	2.09945	3.6144	0	0.31383	1.2357	1.38698	2.21485	5.2724	0	0.499745	1.5777	1.91042	3.1754	5.2781	0	0.402175	1.0158	1.61427	2.83045	6.3529	0	0.2762	0.753565	1.3029
AZU1	-	-	TRUE	FALSE	TRUE	-	-	-0.511298	1	0	0	0	0.00345742	0	1.7702	0	0	0	0	0	0	0	0	0	0	0	0	0	0	0	0.0679403	0	4.3114	0	0	0	0	0	0	0	0	0	0.000917671	0	1.0745	0	0	0	0
BPI	-	-	TRUE	FALSE	TRUE	-	-	-2.35031	1	0	0	0	0.00182256	0	0.52607	0	0	0	0.0939393	0	5.2606	0	0	0	0	0	0	0	0	0	0.0410739	0	4.8878	0	0	0	0	0	0	0	0	0	0.00247183	0	1.7736	0	0	0	0.0176337
CAMP	-	-	TRUE	FALSE	TRUE	-	-	-1.20367	1	0	0	0	0.0938609	0	6.7996	0	0	0	0.0777214	0	4.3524	0	0	0	0	0	0	0	0	0	0	0	0	0	0	0	0	0	0	0	0	0	0.00174889	0	3.559	0	0	0	0.024203
CCL4	TRUE	TRUE	-	FALSE	TRUE	-	-	5.29411	0.000772355	0	0	0	0.247412	0	9.4093	0	0	0	0.0727875	0	2.9657	0	0	0	0.0945285	0	2.2073	0	0	0	2.90485	5.88745	10.634	0	5.99815	8.4194	7.08425	9.57765	11.322	0	0	0	3.47117	7.236	13.734	0	0	0	1.44733
CCL5	-	TRUE	TRUE	FALSE	TRUE	-	TRUE	6.01774	0.138957	0	3.80103	4.42825	4.40408	5.1257	8.5886	0	0.555532	2.4567	2.37504	3.38377	8.0502	0	2.32835	3.63035	3.15482	4.41975	5.9635	0	2.44615	3.1355	3.18591	4.0968	6.6105	0	7.63135	8.5256	7.8775	9.0778	10.333	0	4.8274	7.5943	6.97082	8.97	11.501	0	3.62962	4.69555	5.01599
CCND2	-	-	TRUE	FALSE	TRUE	-	-	1.48405	1	0	0	0	0.822881	0.64609	7.0754	0	0	0	0.888549	1.46227	4.8469	0	0	0	0.669842	0.878945	4.4886	0	0	0	0.477986	0.35197	3.7524	0	0	3.4645	3.00535	5.0503	6.4535	0	0	1.0888	1.9671	3.91355	7.8223	0	0	0	1.19882
CD160	TRUE	TRUE	TRUE	TRUE	TRUE	-	-	6.13218	1.19861e-06	0	0	0	0.0274938	0	5.5648	0	0	0	0	0	0	0	0	0	0.0597129	0	3.7022	0	0	0	0	0	0	0	0	0	2.08365	5.47695	7.6972	0	0	0	0.233911	0	9.039	0	0	0	0.0994739
CD2	-	-	TRUE	FALSE	TRUE	-	-	3.57169	1	0	0	0	0.040931	0	5.7045	0	0	0	0.0153423	0	0.85917	0	0	0	0	0	0	0	0	0	0.0345164	0	2.2597	0	0	0	2.27666	5.7406	7.8844	0	4.72045	6.2747	5.46698	7.17665	9.5794	0	0	0	1.55519
CD244	TRUE	TRUE	TRUE	TRUE	TRUE	TRUE	-	3.82377	0.0318629	0	0	0	0.171327	0	5.5987	0	0	0	0	0	0	0	0	0	0.0361097	0	2.2388	0	0	0	0.446976	0	5.697	0	0	0	1.90104	4.81135	6.725	0	0	0	0.402537	0	7.3739	0	0	0	0.3194
CD247	-	TRUE	TRUE	FALSE	TRUE	-	-	6.24029	0.0997293	0	0	0	0.0515916	0	6.4656	0	0	0	0	0	0	0	0	0	0	0	0	0	0	0	0.0011995	0	0.14274	0	5.05845	6.346	5.65598	7.7733	8.827	0	0	2.2922	2.90355	5.85455	8.8266	0	0	0	1.4915
CD69	-	-	TRUE	FALSE	TRUE	-	-	2.17305	1	0	0	5.72505	4.48783	7.2902	10.528	0	0	0	0.156979	0	4.6704	0	0	0	0	0	0	0	0	0	0.956695	0	6.8933	0	4.66535	6.2338	5.43905	7.37055	9.188	0	0	5.422	4.34435	7.15535	10.764	0	0	2.7786	3.26229
CD7	-	TRUE	TRUE	FALSE	TRUE	-	-	4.83558	0.60611	0	0	0	0.0287339	0	4.6468	0	0	0	0.088675	0	3.2251	0	0	0	0	0	0	0	0	0	0.026446	0	3.0414	0	2.00375	3.1265	3.16697	4.7058	6.6797	0	0	1.1104	1.69602	3.0804	8.5053	0	0	0	0.634605
CD96	-	-	TRUE	FALSE	TRUE	-	-	3.58762	1	0	0	0.009317	0.65125	0.80426	6.7088	0	0	0	0.289773	0.37155	3.493	0	0	0	0.214071	0.320483	2.0915	0	0	0.0071955	0.174499	0.184585	1.5568	0	0.51147	4.1915	3.28946	5.5687	6.8281	0	0.705315	3.6267	3.15017	5.08855	7.8885	0	0	0.711045	1.74268
CDHR1	TRUE	-	TRUE	FALSE	TRUE	-	-	6.44685	5.2258e-07	0	0	0	0.0138435	0	2.5627	0	0	0	0	0	0	0	0	0	0.116101	0	3.058	0	0	0	0.00247025	0	0.29396	0	0	0	0.50251	0	7.2568	0	0	0	0.0964587	0	5.5458	0	0	0	0.0674417
CDK6	-	-	-	FALSE	TRUE	-	-	0.849361	1	0	0	0	0.279126	0	4.8272	0	0	0	0.599077	1.2702	2.8508	0	0	0	0.271961	0	2.8158	0	0	0	0.507792	0.73145	4.3808	0	0	0	1.09579	2.49895	4.8309	0	0	0	0.724643	0.997835	5.7965	0	0	0	0.400367
CEACAM8	-	-	TRUE	FALSE	TRUE	-	-	-0.949549	1	0	0	0.43776	0.752153	1.23513	5.2025	0	0	0	0.251486	0.318375	1.8016	0	0	0	0.368235	0.613755	2.8032	0	0	0.12168	0.322444	0.56156	1.8069	0	0	0	0.506663	0.8651	3.4945	0	0	0.2916	0.595053	0.995665	5.1124	0	0	0.2558	0.643724
CLNK	-	-	TRUE	FALSE	-	-	TRUE	2.2918	1	0	0	0	0.174943	0	6.8025	0	0	0	0	0	0	0	0	0	0.00687952	0	0.42653	0	0	0	0	0	0	0	0	0	0.317014	0	6.4522	0	0	0	0.188106	0	6.9981	0	0	0	0.140143
CMA1	-	-	TRUE	FALSE	-	-	TRUE	1.34027	1	0	0	0	0.00332031	0	1.7	0	0	0	0	0	0	0	0	0	0	0	0	0	0	0	0	0	0	0	0	0	0	0	0	0	0	0	0.00530049	0	3.8955	0	0	0	0.0271667
CRTAM	-	-	TRUE	FALSE	-	-	TRUE	2.29844	1	0	0	0	0.49838	0.837335	5.4149	0	0	0	0.259101	0.217845	2.3219	0	0	0	0.416379	0.894525	2.48	0	0	0.20163	0.516259	0.634525	4.711	0	0	0	0.90912	1.23105	6.9334	0	0	0.58814	1.38936	1.6913	9.7394	0	0	0.241195	0.722977
CSF2	-	-	TRUE	FALSE	TRUE	-	-	2.07741	0.870136	0	0	0	0	0	0	0	0	0	0.0251357	0	1.4076	0	0	0	0	0	0	0	0	0	0.0365555	0	4.3501	0	0	0	0.066451	0	3.389	0	0	0	0.0187522	0	9.9567	0	0	0	0.0228091
CST7	-	TRUE	TRUE	FALSE	TRUE	-	-	5.82753	0.17149	0	0	0	0.0701039	0	6.4307	0	0	0	0.0724929	0	4.0596	0	0	0	0.0411355	0	2.5504	0	0	0	0.389717	0	7.0451	0	5.79515	7.1426	6.15098	8.176	9.0559	0	0	5.4608	3.99209	6.9327	9.6329	0	0	0	1.31763
CTSW	TRUE	TRUE	TRUE	TRUE	TRUE	TRUE	-	6.67012	0.0195096	0	0	0	0.0338455	0	7.4848	0	0	0	0	0	0	0	0	0	0	0	0	0	0	0	0.0984902	0	4.954	0	6.1464	6.9094	6.37221	7.95615	9.4325	0	0	0	2.51849	5.9442	9.3105	0	0	0	1.0378
DEFA4	-	-	TRUE	FALSE	TRUE	-	-	-0.848048	1	0	0	0	0	0	0	0	0	0	0	0	0	0	0	0	0	0	0	0	0	0	0	0	0	0	0	0	0	0	0	0	0	0	0.00111484	0	2.2687	0	0	0	0.00559594
DPP4	-	-	-	FALSE	TRUE	-	-	-0.107095	1	0	0	0	0.0362919	0	3.6041	0	0	0	0.673957	0	5.2088	0	0	0	0.359953	0	4.3226	0	0	0	0	0	0	0	0	0	0.107941	0	5.505	0	0	0	0.312537	0	7.1862	0	0	0	0.319728
ELANE	-	-	TRUE	FALSE	TRUE	-	-	-2.01247	1	0	0	0	0	0	0	0	0	0	0	0	0	0	0	0	0	0	0	0	0	0	0	0	0	0	0	0	0	0	0	0	0	0	0.00512005	0	4.8379	0	0	0	0.00883448
ELOVL6	TRUE	-	-	FALSE	-	TRUE	-	5.45439	1.14268e-05	0	0	0	0.00726133	0	2.0032	0	0	0	0.544729	0	4.1195	0	0	0	0.071079	0	4.4069	0	0	0	0	0	0	0	0	0	0.367831	0	4.7985	0	0	0	0.0921733	0	6.6847	0	0	0	0.0755983
ENPP5	TRUE	-	-	FALSE	-	TRUE	-	5.32946	4.30621e-06	0	0	0	0.0328538	0	4.93	0	0	0	0.070455	0	2.4673	0	0	0	0.158421	0	3.9861	0	0	0	0.00297585	0	0.1776	0	0	0	0.146592	0	5.7709	0	0	0	0.0527635	0	6.7838	0	0	0	0.0663816
EOMES	TRUE	-	TRUE	FALSE	-	-	TRUE	6.21183	0.000157013	0	0	0	0.0204729	0	3.7233	0	0	0	0.0387821	0	2.1718	0	0	0	0	0	0	0	0	0	0.0198067	0	2.357	0	0	0	0.943912	1.10316	5.8874	0	0	0	0.716033	0	7.4085	0	0	0	0.152164
FASLG	TRUE	TRUE	TRUE	TRUE	TRUE	TRUE	TRUE	6.95749	2.05455e-07	0	0	0	0.00826172	0	2.7379	0	0	0	0.00240857	0	0.13488	0	0	0	0	0	0	0	0	0	0	0	0	0	0	0	2.21943	5.72905	8.3041	0	0	0	0.922842	0	8.3273	0	0	0	0.241595
FCGR3A	-	-	TRUE	FALSE	-	TRUE	-	4.79883	1	0	0	0	0.0307221	0	6.4416	0	0	0	0	0	0	0	0	0	0.0156827	0	0.97233	0	4.7857	6.8923	5.70423	7.8522	9.2854	0	0	7.0067	4.71793	7.96975	9.4064	0	0	0	0.224667	0	9.0639	0	0	0	0.613553
FCGR3B	-	-	TRUE	FALSE	-	TRUE	-	0.604398	1	0	0	0	0.00707313	0	2.7922	0	0	0	0	0	0	0	0	0	0	0	0	0	0	0	0.553939	0.82244	7.7212	0	0	0	0.680698	0.45516	3.7008	0	0	0	0.0342	0	4.4082	0	0	0	0.145358
GFI1	TRUE	-	TRUE	FALSE	TRUE	-	-	3.75887	0.0383734	0	0	0	0	0	0	0	0	0	0	0	0	0	0	0	0.0131281	0	0.81394	0	0	0	0	0	0	0	0	0	0.160098	0	3.566	0	0	0	0.22445	0	6.9897	0	0	0	0.0698488
GNLY	TRUE	-	TRUE	FALSE	TRUE	-	-	9.07376	0.000341976	0	0	0	0.0556431	0	9.284	0	0	0	0	0	0	0	0	0	0.0547032	0	3.3916	0	0	0	0.0502018	0	2.5072	0	0	9.5983	7.15988	10.959	12.05	0	0	0	0.58825	0	11.458	0	0	0	0.886256
GPR171	-	-	TRUE	FALSE	TRUE	-	-	1.3244	1	0	0	0	0.0147512	0	5.3949	0	0	0	0.0581232	0	3.2549	0	0	0	0	0	0	0	0	0	0.00183067	0	0.21785	0	0	0	0.480766	0	7.5974	0	0	0	1.71214	4.17745	8.559	0	0	0	0.66697
GPR18	-	-	TRUE	FALSE	TRUE	-	-	-0.717616	1	0	0	0	1.48886	3.07115	7.8536	0	0	0	0.224925	0	4.1973	0	0	0	0.0188903	0	1.1712	0	0	0	0.314056	0	4.8355	0	0	0	0.866676	0	7.418	0	0	0	0.751889	0	7.9367	0	0	0	0.677836
GRAP2	-	-	TRUE	FALSE	TRUE	-	-	1.80487	1	0	0	0	0.0809418	0	6.6434	0	0	0	0	0	0	0	0	0	0	0	0	0	0	0	0	0	0	0	0	0	0.714359	0	6.2752	0	0	0	0.946978	0.70487	8.0572	0	0	0	0.382626
GZMA	TRUE	TRUE	TRUE	TRUE	TRUE	-	-	7.1665	0.00103924	0	0	0	0.0537764	0	7.3166	0	0	0	0	0	0	0	0	0	0	0	0	0	0	0	0.0190622	0	2.2684	0	6.86735	7.6542	6.67894	8.4973	9.3699	0	0	0	3.41028	7.15145	9.7944	0	0	0	1.07699
GZMB	TRUE	TRUE	TRUE	TRUE	TRUE	-	TRUE	10.2245	4.2823e-08	0	0	0	0.0603611	0	8.5691	0	0	0	0	0	0	0	0	0	0.080329	0	2.5566	0	0	0	0.0222934	0	0.8496	0	6.1168	7.7059	6.18759	8.52995	10.091	0	0	0	1.54299	0	11.887	0	0	0	1.08891
GZMH	TRUE	TRUE	TRUE	TRUE	TRUE	-	TRUE	7.75855	0.000176944	0	0	0	0.031649	0	6.9819	0	0	0	0	0	0	0	0	0	0	0	0	0	0	0	0.0150345	0	1.7891	0	0	0	3.23542	7.58775	9.8657	0	0	0	1.46713	0	9.6861	0	0	0	0.539027
GZMK	-	-	TRUE	FALSE	TRUE	-	-	4.37447	0.234938	0	0	0	0.0262589	0	4.7362	0	0	0	0.188504	0	5.3563	0	0	0	0	0	0	0	0	0	0.00694277	0	0.82619	0	0	0	2.46373	6.0187	7.9032	0	0	1.9764	3.58716	7.36795	9.8736	0	0	0	0.967208
GZMM	-	-	TRUE	FALSE	TRUE	-	-	5.39827	0.0683827	0	0	0	0.0197132	0	3.1035	0	0	0	0	0	0	0	0	0	0	0	0	0	0	0	0.00130882	0	0.15575	0	0	5.7264	4.2125	6.4813	8.0543	0	0	0	1.73458	4.5107	8.5125	0	0	0	0.806961
IFNG	TRUE	-	TRUE	FALSE	TRUE	-	-	5.30444	0.000772746	0	0	0	0.0839895	0	4.2376	0	0	0	0	0	0	0	0	0	0	0	0	0	0	0	0.0105055	0	0.75958	0	0	0	0.601706	0	6.7604	0	0	0	1.67252	3.5535	11.274	0	0	0	0.260884
IL12RB2	TRUE	-	TRUE	FALSE	TRUE	-	TRUE	6.08571	1.76482e-06	0	0	0	0.0354519	0	4.9497	0	0	0	0.0572102	0	1.583	0	0	0	0.00441403	0	0.14274	0	0	0	0.0399132	0	4.4598	0	0	0	0.612849	0	5.0091	0	0	0	0.194685	0	7.2208	0	0	0	0.164131
IL15	-	-	-	FALSE	-	-	TRUE	0.261652	1	0	0	0	0.364409	0	6.6443	0	0	0	0.560472	0.595855	4.9752	0	0	0	0.774673	0.693657	4.4913	0	0	0	0.786849	0.95782	5.0602	0	0	0	0.303034	0.248405	3.2801	0	0	0	0.271972	0.150795	5.6022	0	0	0	0.312648
IL18R1	-	-	TRUE	FALSE	TRUE	-	-	4.31291	0.0610576	0	0	0	0.0525276	0	4.8248	0	0	0	0.316991	0	4.0369	0	0	0	0.0511274	0	3.1699	0	0	0	0.0618715	0	4.8383	0	0	0	0.987527	0	6.1131	0	0	0	0.298709	0	7.0918	0	0	0	0.358239
IL18RAP	TRUE	TRUE	TRUE	TRUE	TRUE	-	-	6.55263	0.00678697	0	0	0	0.0351144	0	5.5949	0	0	0	0	0	0	0	0	0	0	0	0	0	0	0	0	0	0	0	0	0	2.09877	4.76355	6.8582	0	0	0	0.181355	0	7.3492	0	0	0	0.268788
IL2RB	TRUE	TRUE	TRUE	TRUE	TRUE	-	-	8.22187	0.0108927	0	0	0	0.0652116	0	5.5535	0	0	0	0.00186321	0	0.10434	0	0	0	0.00937274	0	0.58111	0	0	0	0.0109101	0	0.81803	0	5.17165	6.0598	5.63488	6.6884	8.7997	0	0	2.014	2.34003	4.5001	7.6478	0	0	0	0.812369
KIR2DL1	TRUE	-	TRUE	FALSE	TRUE	TRUE	-	7.37404	4.2823e-08	0	0	0	0.0196821	0	4.2763	0	0	0	0	0	0	0	0	0	0.0196129	0	1.216	0	0	0	0	0	0	0	0	0	0.814155	0	6.8908	0	0	0	0.0369569	0	7.5072	0	0	0	0.0700823
KIR2DL2	-	-	-	FALSE	-	TRUE	-	-	-	-	-	-	-	-	-	-	-	-	-	-	-	-	-	-	-	-	-	-	-	-	-	-	-	-	-	-	-	-	-	-	-	-	-	-	-	-	-	-	-
KIR2DL4	TRUE	TRUE	TRUE	TRUE	TRUE	TRUE	-	4.72105	4.33979e-06	0	0	0	0.0268502	0	5.1614	0	0	0	0	0	0	0	0	0	0.0758339	0	4.7017	0	0	0	0.0449771	0	4.995	0	0	0	1.52357	2.9387	7.4239	0	0	0	0.474356	0	8.4729	0	0	0	0.156679
KIR2DL5A	-	-	-	FALSE	-	TRUE	-	1.89803	1	-	-	-	-	-	-	-	-	-	-	-	-	-	-	-	-	-	-	-	-	-	-	-	-	-	-	-	-	-	-	-	-	-	-	-	-	-	-	-	-
KIR2DS2	TRUE	-	-	FALSE	-	TRUE	-	3.82324	0.0395617	-	-	-	-	-	-	-	-	-	-	-	-	-	-	-	-	-	-	-	-	-	-	-	-	-	-	-	-	-	-	-	-	-	-	-	-	-	-	-	-
KIR2DS4	TRUE	-	TRUE	FALSE	TRUE	-	-	7.37582	8.35665e-08	0	0	0	0.0308846	0	6.2024	0	0	0	0	0	0	0	0	0	0.0199306	0	1.2357	0	0	0	0	0	0	0	0	0	0.574153	0	6.8588	0	0	0	0.0321999	0	7.2961	0	0	0	0.0769647
KIR2DS5	TRUE	-	-	FALSE	-	TRUE	-	3.55592	0.0149883	-	-	-	-	-	-	-	-	-	-	-	-	-	-	-	-	-	-	-	-	-	-	-	-	-	-	-	-	-	-	-	-	-	-	-	-	-	-	-	-
KIR3DL1	TRUE	-	TRUE	FALSE	-	TRUE	-	7.19727	1.91998e-07	0	0	0	0.0220407	0	4.0277	0	0	0	0	0	0	0	0	0	0.041529	0	1.9351	0	0	0	0	0	0	0	0	0	0.643749	0	7.6388	0	0	0	0.0536094	0	7.8737	0	0	0	0.061002
KIR3DL2	TRUE	-	TRUE	FALSE	TRUE	TRUE	-	5.75909	5.08165e-06	0	0	0	0.0262619	0	5.3972	0	0	0	0	0	0	0	0	0	0	0	0	0	0	0	0.00295487	0	0.35163	0	0	0	0.335778	0	6.9246	0	0	0	0.0696326	0	8.2096	0	0	0	0.047854
KIR3DL3	-	-	TRUE	FALSE	-	TRUE	-	1.53009	1	0	0	0	0.0040865	0	1.9826	0	0	0	0	0	0	0	0	0	0	0	0	0	0	0	0	0	0	0	0	0	0.0595706	0	3.0381	0	0	0	0.0134438	0	4.1723	0	0	0	0.0354494
KLF12	-	-	-	FALSE	-	-	TRUE	2.36994	1	0	0	0	0.472913	0.349363	5.3169	0	0	0	0.418925	0.468693	4.047	0	0	0	0.100316	0	1.4131	0	0	0	0.0157591	0	1.2054	0	0	0	0.568078	0.69612	3.8351	0	0	0	0.962713	1.77565	5.6674	0	0	0	0.623416
KLHL30	-	-	TRUE	FALSE	-	-	TRUE	-0.292122	1	0	0	0	0.285947	0.451802	3.8222	0	0	0	0.184211	0.02339	2.2023	0	0	0	0.157827	0.208338	1.0834	0	0	0	0.13797	0.19093	1.3363	0	0	0	0.160652	0.2762	0.86076	0	0	0	0.275104	0.42179	4.3364	0	0	0	0.274316
KLRA1P	-	-	-	FALSE	-	-	TRUE	0.543271	1	-	-	-	-	-	-	-	-	-	-	-	-	-	-	-	-	-	-	-	-	-	-	-	-	-	-	-	-	-	-	-	-	-	-	-	-	-	-	-	-
KLRB1	TRUE	TRUE	TRUE	TRUE	TRUE	-	TRUE	6.85511	0.0110303	0	0	0	0.0327072	0	6.2265	0	0	0	0	0	0	0	0	0	0	0	0	0	0	0	0	0	0	0	5.6421	7.0729	6.08287	8.33035	9.4954	0	0	0	0.968724	0	9.9579	0	0	0	0.78297
KLRC3	TRUE	TRUE	TRUE	TRUE	TRUE	TRUE	TRUE	7.51258	4.12908e-06	0	0	0	0.0214128	0	2.6812	0	0	0	0	0	0	0	0	0	0	0	0	0	0	0	0.026963	0	2.1957	0	0	0	2.03104	4.4634	7.2796	0	0	0	0.904892	0	8.6509	0	0	0	0.271174
KLRC4	TRUE	-	TRUE	FALSE	TRUE	-	-	7.06314	2.61801e-05	0	0	0	0.0150329	0	4.6405	0	0	0	0	0	0	0	0	0	0	0	0	0	0	0	0.0126462	0	1.5049	0	0	2.33	2.55355	4.69585	7.9571	0	0	0	1.29125	2.6072	7.9999	0	0	0	0.467144
KLRD1	TRUE	TRUE	TRUE	TRUE	TRUE	TRUE	TRUE	9.10646	6.27205e-07	0	1.69223	2.30015	2.30123	2.817	6.9317	0	0.888513	1.4064	1.58172	2.2999	3.7523	0	0.87821	2.04795	1.84965	2.65568	3.9066	0	1.082	1.3846	1.43452	1.829	3.7863	1.5211	5.1212	5.9405	5.58254	6.3779	8.0627	0	1.8978	2.6774	3.10978	4.35115	8.1948	0	1.5522	2.40725	2.59731
KLRF1	TRUE	TRUE	TRUE	TRUE	TRUE	TRUE	-	7.68091	8.40772e-11	0	0	0	0.0160162	0	3.2328	0	0	0	0	0	0	0	0	0	0.0893	0	5.5366	0	0	0	0.00645445	0	0.76808	0	3.0569	5.7265	4.46001	6.44605	8.6906	0	0	0	0.0418371	0	7.7173	0	0	0	0.194614
KLRF2	TRUE	-	TRUE	FALSE	-	-	TRUE	2.83156	0.0478988	0	0	0	0.00275352	0	1.4098	0	0	0	0	0	0	0	0	0	0	0	0	0	0	0	0	0	0	0	0	0	0	0	0	0	0	0	0.000460398	0	0.93691	0	0	0	0.0841879
KLRG1	-	-	TRUE	FALSE	-	-	TRUE	3.07276	0.290632	0	0	0	0.267527	0	5.325	0	0	0	0.123651	0	1.7321	0	0	0	0.384525	0	5.1225	0	0	0	0.272608	0.272615	4.4934	0	0	0	0.935606	0.968495	7.1425	0	0	0	0.962654	0.79533	9.5229	0	0	0	0.547936
KLRK1	TRUE	TRUE	TRUE	TRUE	TRUE	-	TRUE	6.57863	0.00242651	0	0	0	0.20742	0	7.4254	0	0	0	0.102134	0	5.7195	0	0	0	0.0208108	0	0.85838	0	0	0	0.0372203	0	3.8539	0	5.89315	6.864	6.42216	7.5188	8.7927	0	0	3.4267	3.4994	6.96745	9.8805	0	0	0	1.28684
LCK	-	-	TRUE	FALSE	TRUE	-	-	3.49833	1	0	0	0	0.940109	0	7.5786	0	0	0	0.080083	0	3.9888	0	0	0	0.00280274	0	0.17377	0	0	0	0.0444855	0	3.0817	0	0	4.9128	3.72501	6.66815	8.0446	0	0.068095	5.8399	4.58533	6.87775	9.0953	0	0	0	1.84276
LOC653757	-	-	-	FALSE	-	TRUE	-	-	-	-	-	-	-	-	-	-	-	-	-	-	-	-	-	-	-	-	-	-	-	-	-	-	-	-	-	-	-	-	-	-	-	-	-	-	-	-	-	-	-
LTA	-	-	TRUE	FALSE	TRUE	-	-	0.953204	1	0	0	0	0.479425	0	7.8922	0	0	0	0	0	0	0	0	0	0	0	0	0	0	0	0.00817084	0	0.97233	0	0	0	0.481792	0	6.4428	0	0	0	0.354469	0	9.2099	0	0	0	0.240573
LTB	-	-	TRUE	FALSE	TRUE	-	-	-3.2559	0.884964	0	0	5.29975	4.22802	6.6795	9.6852	0	0	0	0.197391	0	5.135	0	0	0	0.720979	0	8.0552	0	0	0	0.319777	0	5.6142	0	0	0	0.563049	0	7.4016	0	0	0	2.18262	5.51065	9.9122	0	0	0	2.57916
MGAM	-	-	TRUE	FALSE	TRUE	-	-	4.44146	0.301525	0	0	0	0.0127953	0	1.5941	0	0	0	0.0199589	0	1.1177	0	0	0	0.0112106	0	0.43082	0	0	0	0.0897427	0	5.4551	0	0	0	0.159644	0	6.4075	0	0	0	0.0166252	0	3.3526	0	0	0	0.0752082
MGC24103	-	-	-	FALSE	-	TRUE	-	-	-	-	-	-	-	-	-	-	-	-	-	-	-	-	-	-	-	-	-	-	-	-	-	-	-	-	-	-	-	-	-	-	-	-	-	-	-	-	-	-	-
MS4A3	TRUE	-	TRUE	FALSE	TRUE	-	-	5.74198	0.00323277	0	0	0	0.00342422	0	1.7532	0	0	0	0	0	0	0	0	0	0	0	0	0	0	0	0	0	0	0	0	0	0	0	0	0	0	0	0.00666015	0	6.066	0	0	0	0.0133271
MYBL1	TRUE	-	-	FALSE	-	TRUE	-	5.18818	0.0186486	0	0	0	0.0735887	0	3.1252	0	0	0	0.0352989	0	0.91303	0	0	0	0.0366785	0	1.2467	0	0	0	0.00984202	0	1.1712	0	0	0	0.765607	0.7031	5.5182	0	0	0	0.095616	0	6.4508	0	0	0	0.123136
NAALADL1	-	-	TRUE	FALSE	TRUE	-	-	2.4876	0.186635	0	0	0	0.113102	0	5.3555	0	0	0	0.267264	0	3.9249	0	0	0	0.316771	0	4.8184	0	0	0	0.0614309	0	2.898	0	0	0	0.127871	0	4.2717	0	0	0	0.265562	0	6.7528	0	0	0	0.206513
NCAM1	TRUE	-	-	FALSE	-	-	TRUE	8.90862	1.17906e-11	0	0	0	0.0148139	0	2.0115	0	0	0	0.154718	0	4.7399	0	0	0	0.460974	0	3.3433	0	0	0	0.000463832	0	0.055196	0	0	2.5036	2.30928	4.05605	5.7224	0	0	0	0.0306821	0	5.2296	0	0	0	0.193331
NCR1	TRUE	TRUE	TRUE	TRUE	-	-	TRUE	7.21482	5.40482e-08	0	0	0	0	0	0	0	0	0	0	0	0	0	0	0	0	0	0	0	0	0	0	0	0	0	0	0	1.97335	4.5142	7.0196	0	0	0	0.176616	0	6.9245	0	0	0	0.207268
NCR3	-	TRUE	TRUE	FALSE	TRUE	-	-	3.80109	0.0795276	0	0	0	0.649129	0	7.5468	0	0	0	0	0	0	0	0	0	0.0298645	0	1.8516	0	0	0	0	0	0	0	0	0	1.90415	4.7702	7.2702	0	0	0	0.145228	0	7.5517	0	0	0	0.54177
NKG7	TRUE	TRUE	TRUE	TRUE	TRUE	-	TRUE	6.89516	0.0226944	0	0	0	0.101919	0	9.3131	0	0	0	0.0513143	0	2.8736	0	0	0	0.0581468	0	3.6051	0	0	0	0.493014	0	6.2699	0	8.64135	9.276	8.84024	9.8084	10.923	0	0	5.8899	4.33707	8.21255	11.006	0	0	0	1.4411
NME8	TRUE	-	TRUE	FALSE	TRUE	-	-	4.73275	0.0172402	0	0	0	0.00481133	0	2.4634	0	0	0	0	0	0	0	0	0	0.0491258	0	1.905	0	0	0	0.156146	0	3.3977	0	0	0	0.241243	0	5.7996	0	0	0	0.0137018	0	3.9845	0	0	0	0.0856545
OSM	-	-	TRUE	FALSE	TRUE	-	-	-0.413355	1	0	0	0	0.0460121	0	6.4126	0	0	0	0	0	0	0	0	0	0	0	0	0	0	0	0.801378	0	9.6919	0	0	0	0	0	0	0	0	0	0.167635	0	8.6214	0	0	0	0.226487
PLEKHF1	TRUE	-	-	FALSE	TRUE	-	-	4.57809	0.00795067	0	0	0	0.128771	0	6.2626	0	0	0	0.797395	1.07298	5.644	0	0	0	0.104595	0	4.0984	0	0	0	0.0388412	0	4.6221	0	0	0	1.146	0	7.0833	0	0	0	0.683762	0	8.8664	0	0	0	0.333024
POGK	-	-	-	FALSE	-	-	TRUE	-0.207302	1	0	0	0	0.373904	0	5.7919	0	0	0	0.435633	0.322327	3.5113	0	0	0	1.13587	2.50295	4.9176	0	0	0	0.523118	0.222383	4.8737	0	0	0	0.462204	0	4.3957	0	0	0	0.396848	0	6.7371	0	0	0	0.401141
PRF1	TRUE	TRUE	TRUE	TRUE	TRUE	-	TRUE	8.7306	0.000388267	0	0	0	0.074774	0	7.5492	0	0	0	0.0334638	0	0.9138	0	0	0	0.068154	0	3.5302	0	0	0	0.0547057	0	1.1953	0	6.4315	8.0778	7.73034	9.40235	11.581	0	0	1.583	3.20182	6.55435	9.9955	0	0	0	1.06571
PRR5L	TRUE	-	-	FALSE	TRUE	-	-	3.49327	0.0106864	0	0	0	0.038236	0	4.5842	0	0	0	0.142219	0	4.8049	0	0	0	0.588063	0	5.2386	0	0	0	0.474954	0	4.6632	0	0	0	1.05691	1.1636	5.7459	0	0	0	0.471916	0	6.8812	0	0	0	0.23426
PTGDR	TRUE	-	TRUE	FALSE	TRUE	TRUE	-	7.81741	8.54326e-07	0	0	0	0.0284578	0	5.4588	0	0	0	0.103018	0	4.2024	0	0	0	0.00730839	0	0.45312	0	0	0	0	0	0	0	0	3.1097	2.7487	4.8945	7.0278	0	0	0	0.280716	0	8.0445	0	0	0	0.416381
PTGER2	-	TRUE	TRUE	FALSE	TRUE	-	-	2.60294	1	0	0	0	0.00188033	0	0.96273	0	0	0	0.721038	0	6.1719	0	0	0	0	0	0	0	0	0	0.737441	0	6.8476	0	0	0	1.78339	4.53415	7.1296	0	0	0	0.489575	0	7.8832	0	0	0	0.374809
PTPRCAP	-	-	TRUE	FALSE	TRUE	-	-	1.96574	1	0	5.78643	6.78405	6.04121	7.59093	10.135	0	0	0	0.518142	0	7.2813	0	0	0	0.0958442	0	3.1912	0	0	0	0.128859	0	5.4618	0	6.4277	7.1435	6.46056	7.79235	9.4494	0	5.9555	7.1537	6.25933	7.99135	10.398	0	0	5.7236	4.11412
PVRIG	-	TRUE	TRUE	FALSE	TRUE	-	-	1.96483	1	0	0	0	1.45965	3.08833	8.3701	0	0	0	0.190325	0	3.9582	0	0	0	0.166382	0	2.9846	0	0	0	0.0437626	0	1.275	0	0	0	2.75235	6.04405	7.8843	0	0	0	2.27864	5.20615	8.1529	0	0	0	1.27764
PYHIN1	TRUE	-	TRUE	FALSE	-	TRUE	-	5.07873	0.0395617	0	0	0	0.22035	0	5.8379	0	0	0	0.0959216	0	2.7455	0	0	0	0	0	0	0	0	0	0.158904	0	3.0442	0	0.40779	4.5265	3.75257	5.8023	7.5365	0	0	2.0841	2.50718	4.8217	8.8684	0	0	0	0.734085
RAB27B	TRUE	-	-	FALSE	-	TRUE	-	5.66486	2.41103e-06	0	0	0	0.00454394	0	2.3265	0	0	0	0.0474477	0	1.2351	0	0	0	0	0	0	0	0	0	0	0	0	0	0	0	0.287599	0	4.7001	0	0	0	0.0461707	0	5.0013	0	0	0	0.0658235
S1PR5	TRUE	TRUE	-	FALSE	TRUE	-	TRUE	8.39006	4.35435e-06	0	0	0	0.0702704	0	6.0949	0	0	0	0.260197	0	3.5233	0	0	0	0.0650421	0	3.0866	0	0	0	0.0328277	0	0.75189	0	0	0.20664	2.79156	6.4951	7.6759	0	0	0	0.118532	0	7.6761	0	0	0	0.280772
SAMD3	TRUE	-	TRUE	FALSE	-	TRUE	-	5.60335	0.0149469	0	0	0	0.0125836	0	5.1077	0	0	0	0.183894	0	4.43	0	0	0	0.0428016	0	2.6537	0	0	0	0	0	0	0	0	2.7805	2.81617	5.32865	6.8097	0	0	0	0.951017	0	8.1729	0	0	0	0.471508
SERPINB9	-	-	-	FALSE	-	-	TRUE	-0.0122004	1	0	0.923302	2.9609	3.0067	5.01717	7.3017	0	0	0.591415	1.55167	2.419	6.6178	0	1.54992	3.6913	3.53643	5.36355	7.1522	0	1.55155	3.6581	3.32741	4.8908	8.1682	0	0.316765	1.1661	1.97236	3.4673	6.2383	0	0.8528	2.4594	2.83981	4.80635	8.8446	0	0.575793	2.3982	2.75564
SH2D1A	TRUE	-	TRUE	FALSE	TRUE	-	-	5.69651	0.0140822	0	0	0	0.0505817	0	4.3653	0	0	0	0	0	0	0	0	0	0	0	0	0	0	0	0.00341168	0	0.40599	0	0	1.9245	2.48846	5.11065	7.0223	0	0	0.39726	2.35244	4.9374	8.4449	0	0	0	0.691043
SH2D1B	TRUE	-	TRUE	FALSE	-	TRUE	-	9.88223	7.0979e-11	0	0	0	0.0200435	0	6.35	0	0	0	0.0474696	0	2.6583	0	0	0	0	0	0	0	0	0	0	0	0	0	0	3.014	3.28429	6.35175	7.4413	0	0	0	0.179913	0	8.2468	0	0	0	0.347821
SOCS1	-	-	TRUE	FALSE	TRUE	-	-	0.228761	1	0	0	0	0.237246	0	7.0336	0	0	0	0.302548	0	4.2414	0	0	0	0	0	0	0	0	0	0.308488	0	4.5857	0	0	0	0.444132	0	5.9465	0	0	0	0.417015	0	7.37	0	0	0	0.467152
STYK1	TRUE	-	-	FALSE	-	-	TRUE	5.7114	6.32004e-05	0	0	0	0.0162271	0	3.0801	0	0	0	0.125126	0	1.8836	0	0	0	0.0749097	0	3.0432	0	0	0	0.00124336	0	0.14796	0	0	0	0.346565	0	5.0352	0	0	0	0.0633733	0	6.8337	0	0	0	0.032734
TBX21	TRUE	-	TRUE	FALSE	TRUE	-	TRUE	6.15962	0.00497247	0	0	0	0.0297016	0	4.8276	0	0	0	0.00484696	0	0.27143	0	0	0	0	0	0	0	0	0	0.0027537	0	0.32769	0	0	0	0.40931	0	4.0383	0	0	0	0.238143	0	6.492	0	0	0	0.108133
TEP1	-	-	-	FALSE	TRUE	-	-	-0.0877726	1	0	0	0.322505	0.76334	0.859147	5.7607	0	0	0.189035	0.512447	0.714725	3.1067	0	0.0155305	0.43417	0.821451	1.37025	4.0795	0	0	0.13225	0.540613	0.431335	3.8431	0	0.0413515	0.34142	0.560643	0.670515	3.2223	0	0	0.29042	0.641111	0.692875	5.7453	0	0	0.275605	0.57148
TNF	-	-	TRUE	FALSE	-	-	TRUE	0.426833	1	0	0	0	0.524425	0	7.7258	0	0	0	0.0427107	0	2.3918	0	0	0	0	0	0	0	0	0	1.37541	2.75665	8.4001	0	0	0	0.499449	0	5.9732	0	0	0	0.474892	0	9.4807	0	0	0	0.409666
TNFSF14	-	-	TRUE	FALSE	TRUE	-	-	3.4737	0.368265	0	0	0.5787	0.743391	1.2621	4.3163	0	0	0	0.531184	0.651068	4.1701	0	0	0.264085	0.600048	1.07394	2.7835	0	0	0.31267	0.489206	0.592625	5.0488	0	0	0.90227	1.3432	1.6277	6.1107	0	0	0.85679	1.12468	1.50715	8.2559	0	0	0.60739	0.891444
TRBC1	-	-	TRUE	FALSE	TRUE	-	-	-	-	-	-	-	-	-	-	-	-	-	-	-	-	-	-	-	-	-	-	-	-	-	-	-	-	-	-	-	-	-	-	-	-	-	-	-	-	-	-	-	-
TRDC	TRUE	-	TRUE	FALSE	TRUE	-	-	8.17665	2.12664e-08	-	-	-	-	-	-	-	-	-	-	-	-	-	-	-	-	-	-	-	-	-	-	-	-	-	-	-	-	-	-	-	-	-	-	-	-	-	-	-	-
TTC38	TRUE	TRUE	-	FALSE	TRUE	-	-	4.59357	4.2742e-05	0	0	0	0.133273	0	5.4995	0	0	0	0.519569	0.113017	4.6179	0	0	0	0.581542	0	4.9758	0	0	0	0.610603	0	6.1441	0	0	0	1.78847	4.1675	6.7274	0	0	0	0.367164	0	7.2751	0	0	0	0.292084
TXK	-	-	TRUE	FALSE	TRUE	TRUE	-	4.81914	0.0541506	0	0	0	0.0425215	0	4.7186	0	0	0	0.00240857	0	0.13488	0	0	0	0.00872613	0	0.54102	0	0	0	0.00437857	0	0.52105	0	0	3.7625	3.13085	5.63255	7.1788	0	0	0	0.895937	0	7.8002	0	0	0	0.898706
XCL1	TRUE	TRUE	TRUE	TRUE	-	TRUE	-	7.21929	7.39366e-07	0	0	0	0.0132654	0	2.7964	0	0	0	0.0250393	0	1.4022	0	0	0	0	0	0	0	0	0	0.0204403	0	2.4324	0	0	0	2.63576	5.8418	8.8759	0	0	0	0.593433	0	9.116	0	0	0	0.262088
XCL2	TRUE	TRUE	TRUE	TRUE	-	TRUE	-	7.13385	1.69113e-08	0	0	0	0.0161232	0	4.1345	0	0	0	0.0289643	0	1.622	0	0	0	0	0	0	0	0	0	0	0	0	0	0	0	2.42204	5.86815	9.9644	0	0	0	0.875059	0	10.494	0	0	0	0.345292
ZAP70	-	-	TRUE	FALSE	TRUE	-	-	5.39641	0.746247	0	0	0	0.17589	0	6.3818	0	0	0	0.0797173	0	3.5007	0	0	0	0	0	0	0	0	0	0.0280176	0	1.201	0	1.9722	4.5212	4.13199	6.569	8.0058	0	0	4.3755	3.55074	5.8486	8.0765	0	0	0	1.49182
ZNF135	-	-	TRUE	FALSE	TRUE	-	-	1.38994	1	0	0	0	0.339761	0	6.9232	0	0	0	0.662324	0.0330625	5.9027	0	0	0	0.585317	0	5.6677	0	0	0	0.0886877	0	3.363	0	0	0	0.123269	0	3.6121	0	0	0	0.132254	0	6.5559	0	0	0	0.250667
[truncated: 2 more columns]
